# Supplementary figures and images for: Generation of monodispersed microdroplets by temperature controlled bubble condensation processes
Source: Royal Society of Chemistry journal article supplement (doi:10.1039/c2lc40159b), 2012-10-22

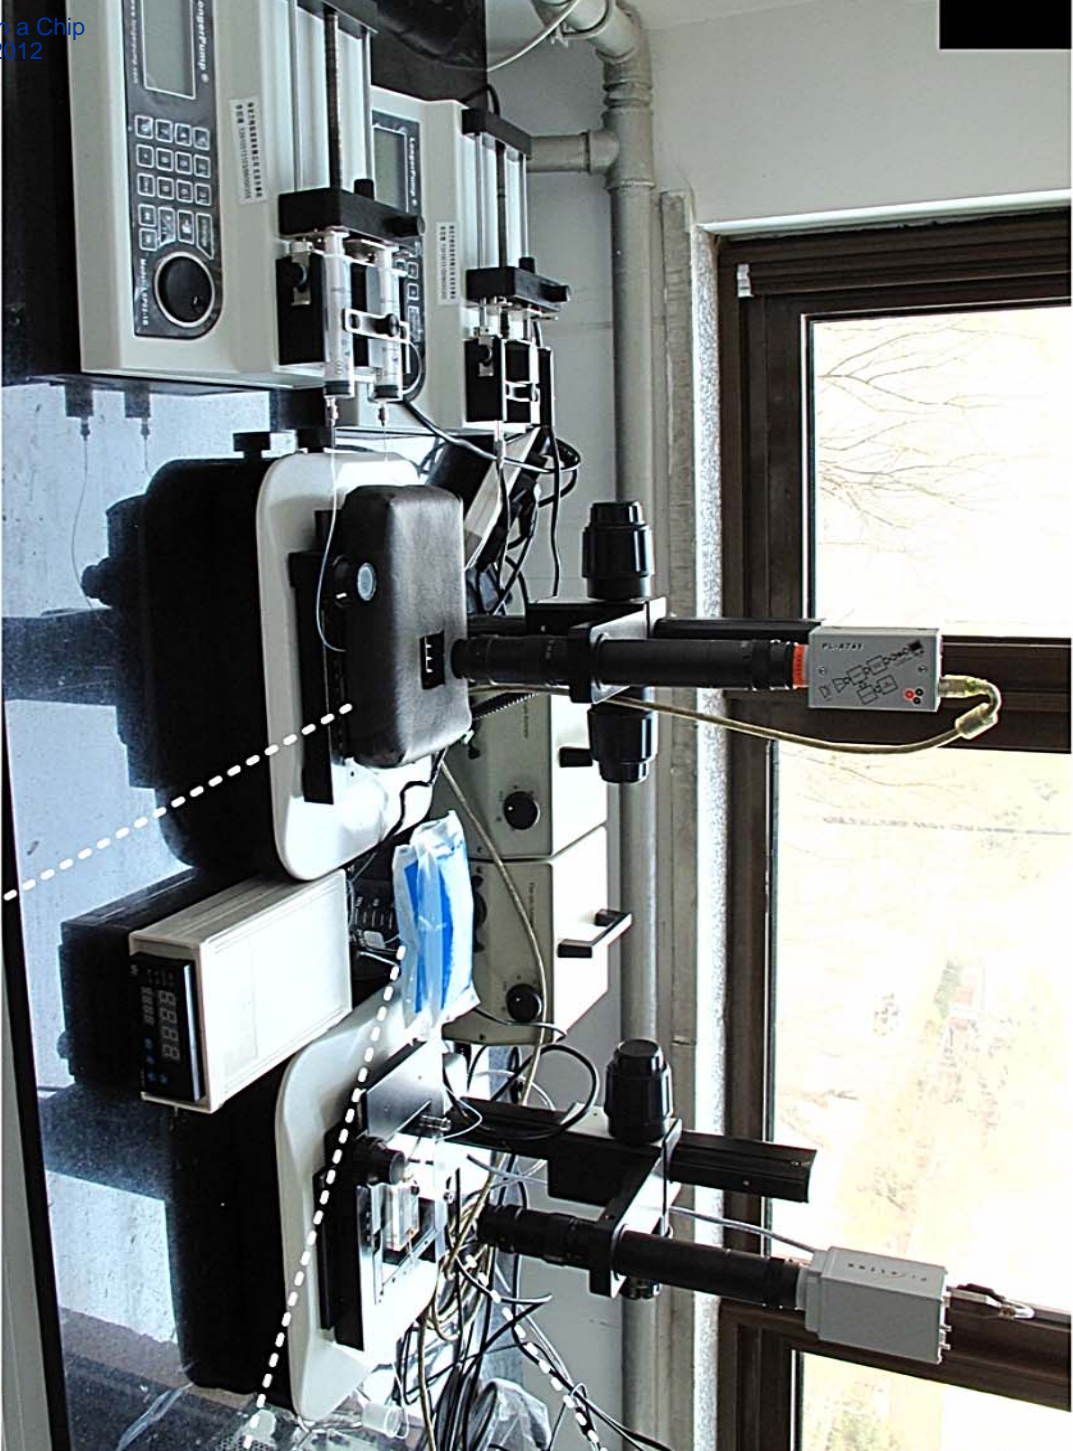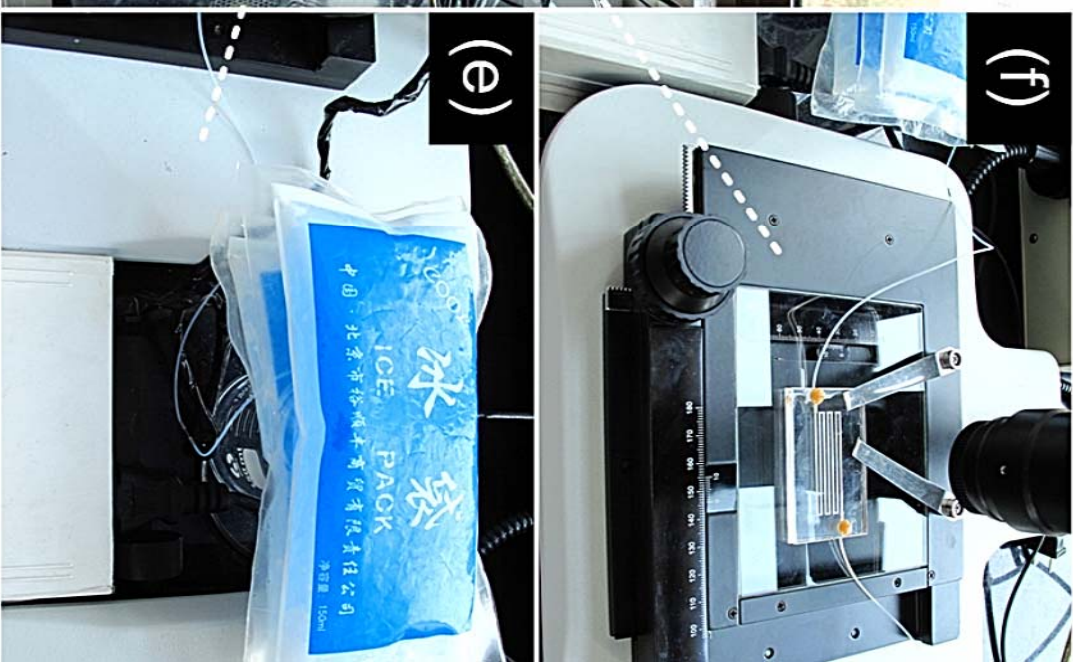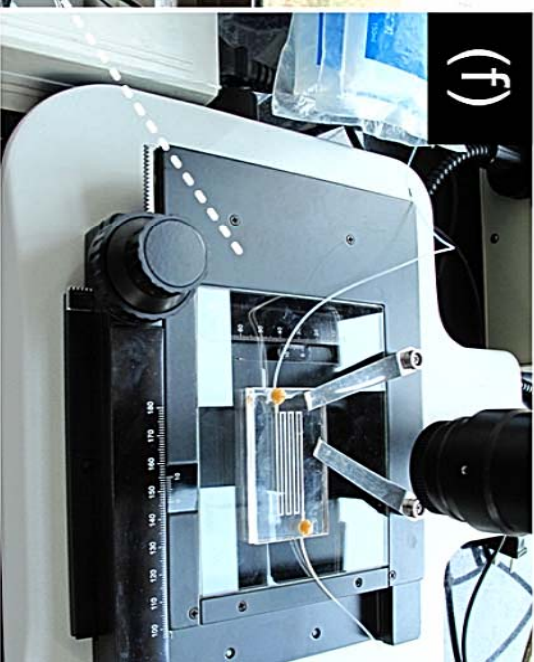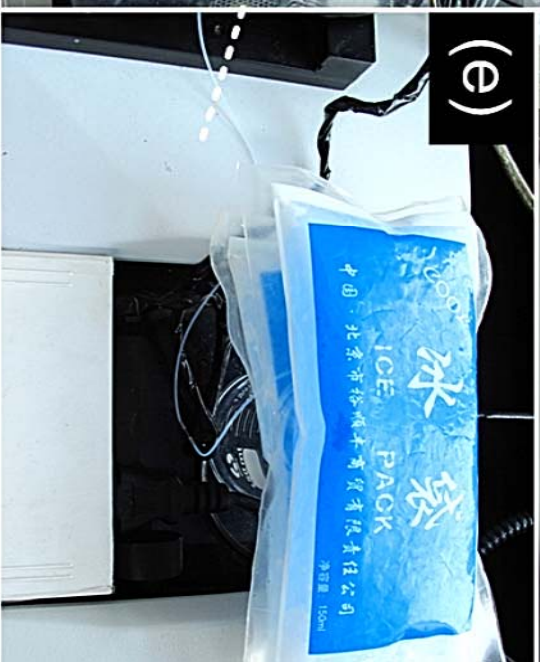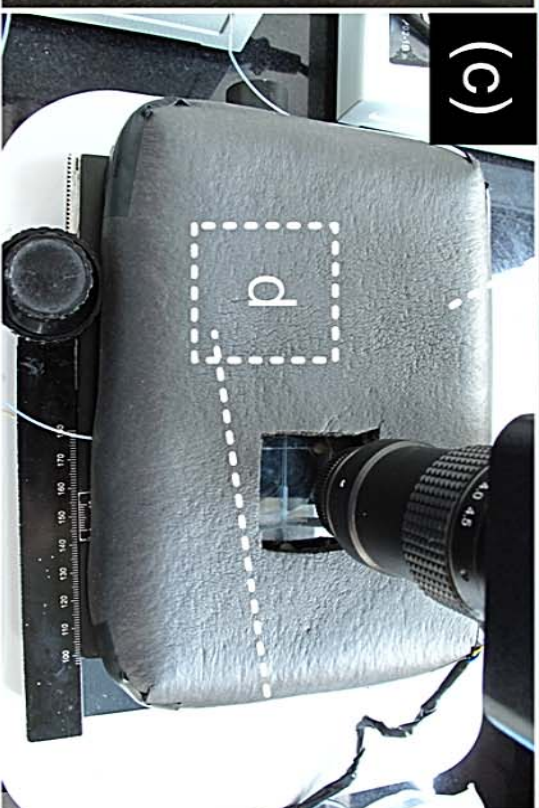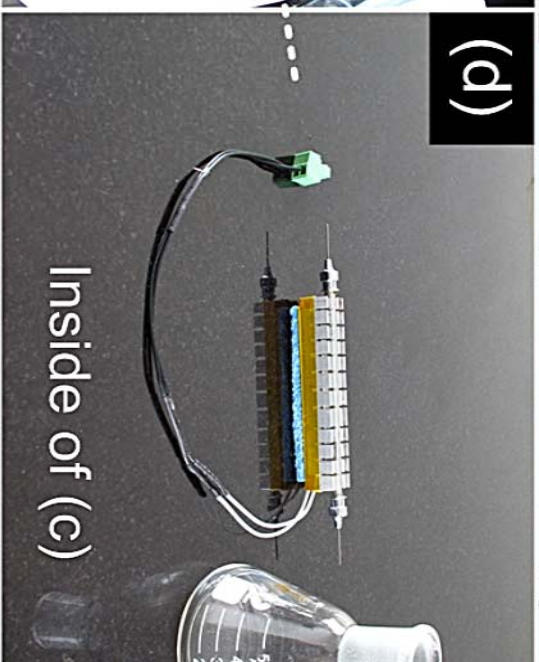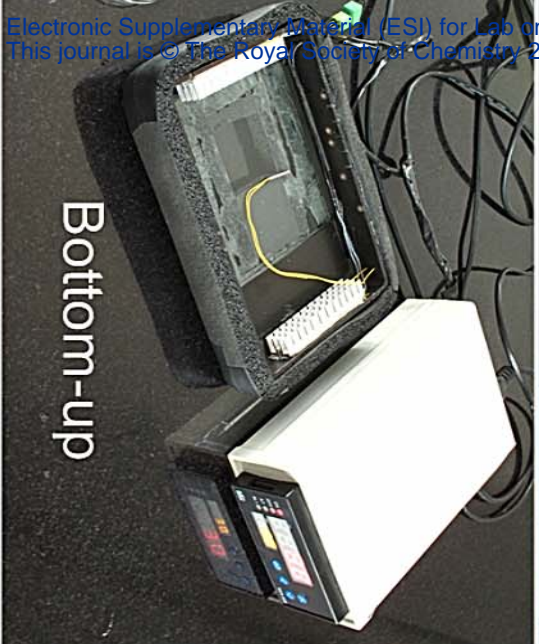

Bottom-up

(c)

(d)

(e)

(f)

Inside of (c)

Supplement: c2lc40159b.pdf [file c2lc40159b.pdf]
